# Supplementary material for: Formation of a robust Ru4O4 skeleton with two Ru2(CO)4 units in criss–cross configuration
Source: Royal Society of Chemistry journal article supplement (doi:10.1039/c6ra02558g), 2016-01-01
Supplement: c6ra02558g1.pdf [file c6ra02558g1.pdf]

## Electronic Supplementary Information for Dalton Transactions

### Formation of A Robust Ru<sub>4</sub>O<sub>4</sub> Skeleton with Two Ru<sub>2</sub>(CO)<sub>4</sub> Units in Criss-Cross Configuration

Jindou Yang, Xian Wang, Weiqiang Zhang,\* Guofang Zhang,\* and Ziwei Gao

Key Laboratory of Applied Surface and Colloid Chemistry, MOE/School of Chemistry and Chemical Engineering, Shaanxi Normal University, Xi'an 710062, China

**Fig. S1** Ball-and-stick model representation of DFT structure of Ru<sub>4</sub>(CO)<sub>8</sub>(μ<sub>2</sub>-O, η<sup>1</sup>-N-pic)<sub>4</sub> (**1**) and selected bond lengths and angles. (H atoms excluded for clarity)

**Fig. S2** Ball-and-stick model representation of DFT structure of Ru<sub>4</sub>(CO)<sub>8</sub>(μ<sub>2</sub>-O, η<sup>1</sup>-O-fur)<sub>4</sub> (**2c**) and selected bond lengths and angles. (H atoms excluded for clarity)

**Fig. S3** Ball-and-stick model representation of DFT structure of Ru<sub>4</sub>(CO)<sub>8</sub>(μ<sub>2</sub>-O, η<sup>1</sup>-S-thi)<sub>4</sub> (**3c**) and selected bond lengths and angles. (H atoms excluded for clarity)

**Fig. S4** Ball-and-stick model representation of single-crystal X-ray diffraction structure of Ru<sub>4</sub>(CO)<sub>8</sub>(μ<sub>2</sub>-O, η<sup>1</sup>-N-pic)<sub>4</sub>·H<sub>2</sub>O (**4**) and selected bond lengths and angles

**Fig. S5** Ball-and-stick model representation of single-crystal X-ray diffraction structure of Ru<sub>4</sub>(CO)<sub>8</sub>(μ<sub>2</sub>-O, η<sup>1</sup>-N-pic)<sub>4</sub>·CH<sub>3</sub>CN (**5**) and selected bond lengths and angles

**Fig. S6** Ball-and-stick model representation of the packing structure of compound Ru<sub>2</sub>(CO)<sub>4</sub>(fur)<sub>2</sub>(H<sub>2</sub>O)<sub>2</sub>·H<sub>2</sub>O (**2b**)

**Fig. S7** Ball-and-stick model representation of the packing structure of compound Ru<sub>2</sub>(CO)<sub>4</sub>(thi)<sub>2</sub>·(CH<sub>3</sub>OH)<sub>2</sub>·CH<sub>3</sub>OH (**3b**)

**Fig. S8** <sup>1</sup>H NMR spectra of compounds **1**, **1a**, **2**, **2b** and **3b**

**Fig. S9** IR spectra of compounds **1**, **1a**, **2a**, **2**, **2b**, **3a**, **3** and **3b**

**Table S1.** Crystal and refinement data of **1**, **2b**, **3b**, **4** and **5**

**Table S2.** Hydrogen bonding distances (nm) and angles (°) for **2b** and **3b**

**Table S3.** The geometric parameters of Ru<sub>4</sub>(CO)<sub>8</sub>(μ<sub>2</sub>-O, η<sup>1</sup>-N-pic)<sub>4</sub> (**1**)

**Table S4.** The geometric parameters of Ru<sub>4</sub>(CO)<sub>8</sub>(μ<sub>2</sub>-O, η<sup>1</sup>-O-fur)<sub>4</sub> (**2c**)

**Table S5.** The geometric parameters of Ru<sub>4</sub>(CO)<sub>8</sub>(μ<sub>2</sub>-O, η<sup>1</sup>-S-thi)<sub>4</sub> (**3c**)

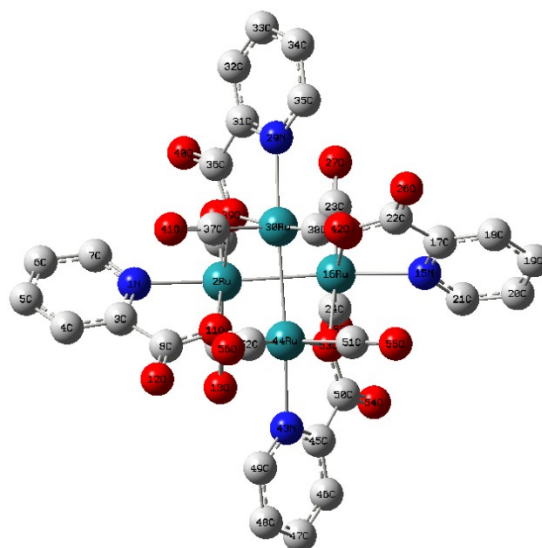

**Fig. S1** A) Ball-and-stick model representation of DFT structure of  $\text{Ru}_4(\text{CO})_8(\mu_2\text{-O}, \eta^1\text{-N-pic})_4$  (**1**). Selected bond lengths [ $\text{\AA}$ ] and angles [ $^\circ$ ]:  $\text{Ru2} - \text{Ru16} = 2.823$ ;  $\text{Ru16} - \text{N15} = 2.232$ ;  $\text{Ru16} - \text{O25} = 2.215$ ;  $\text{Ru16} - \text{O53} = 2.157$ ;  $\text{Ru30} - \text{Ru44} = 2.823$ ;  $\text{Ru44} - \text{N43} = 2.232$ ;  $\text{Ru44} - \text{O53} = 2.214$ ;  $\text{Ru44} - \text{O11} = 2.157$ ;  $\text{N15} - \text{Ru16} - \text{O25} = 73.827$ ;  $\text{Ru16} - \text{O25} - \text{Ru30} = 119.675$ ;  $\text{Ru16} - \text{O53} - \text{Ru44} = 119.675$ ;  $\text{O25} - \text{Ru16} - \text{Ru2} = 97.152$ ;  $\text{O25} - \text{Ru16} - \text{O53} = 83.432$ . B). Color code: Green = Ru, red = O, grey = C, blue = N. hydrogen atoms are omitted for clarity.

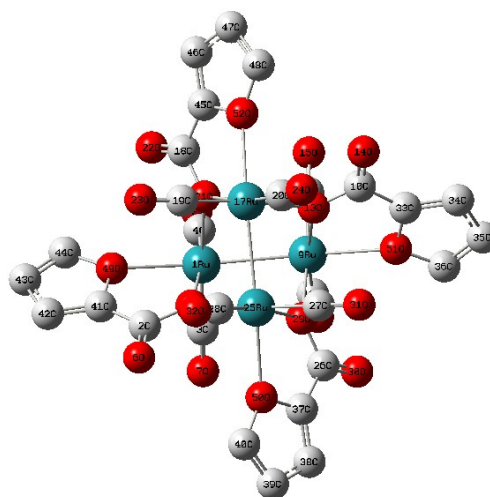

**Fig. S2** A) Ball-and-stick model representation of DFT structure of  $\text{Ru}_4(\text{CO})_8(\mu_2\text{-O}, \eta^1\text{-O-fur})_4$  (**2c**). Selected bond lengths [ $\text{\AA}$ ] and angles [ $^\circ$ ]:  $\text{Ru17} - \text{Ru25} = 2.741$ ;  $\text{Ru17} - \text{O64} = 2.360$ ;  $\text{Ru17} - \text{O21} = 2.219$ ;  $\text{Ru17} - \text{O13} = 2.135$ ;  $\text{Ru1} - \text{Ru9} = 2.740$ ;  $\text{Ru1} - \text{O21} = 2.135$ ;  $\text{Ru1} - \text{O61} = 2.359$ ;  $\text{Ru1} - \text{O5} = 2.219$ ;  $\text{O21} - \text{Ru17} - \text{O13} = 83.611$ ;  $\text{O21} - \text{Ru17} - \text{O64} = 70.803$ ;  $\text{O21} - \text{Ru17} - \text{Ru25} = 97.914$ ;  $\text{O61} - \text{Ru1} - \text{O5} = 70.776$ ;  $\text{O21} - \text{Ru1} - \text{O5} = 83.660$ ;  $\text{O21} - \text{Ru1} - \text{Ru9} = 82.921$ ;  $\text{Ru1} - \text{O5} - \text{Ru25} = 118.230$ ;  $\text{O5} - \text{Ru25} - \text{Ru17} = 82.922$ ;  $\text{O5} - \text{Ru25} - \text{O29} = 83.611$ ;  $\text{C19} - \text{Ru17} - \text{C20} = 90.989$ ;  $\text{C4} - \text{Ru1} - \text{C3} = 90.949$ ; B). Color code: Green = Ru, red = O, grey = C. Hydrogen atoms are omitted for clarity.

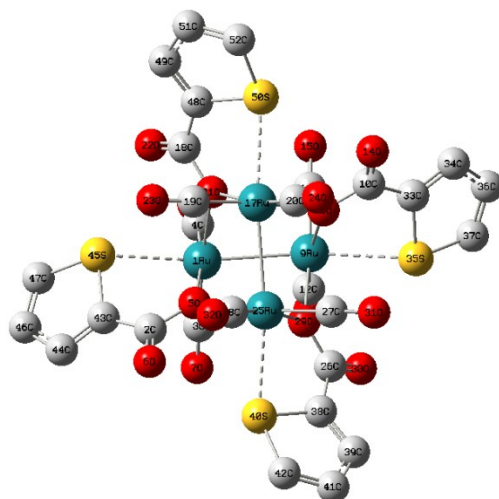

**Fig. S3** A) Ball-and-stick model representation of DFT structure of  $\text{Ru}_4(\text{CO})_8(\mu_2\text{-O}, \eta^1\text{-S-thi})_4$  (**3c**). Selected bond lengths [ $\text{\AA}$ ] and angles [ $^\circ$ ]:  $\text{Ru1} - \text{Ru9} = 2.747$ ;  $\text{Ru1} - \text{S45} = 2.745$ ;  $\text{Ru1} - \text{O21} = 2.140$ ;  $\text{Ru17} - \text{O21} = 2.256$ ;  $\text{Ru17} - \text{Ru25} = 2.747$ ;  $\text{Ru25} - \text{S40} = 2.745$ ;  $\text{Ru25} - \text{O29} = 2.256$ ;  $\text{Ru25} - \text{O5} = 2.141$ ;  $\text{O21} - \text{Ru17} - \text{O13} = 84.171$ ;  $\text{S50} - \text{Ru17} - \text{O13} = 86.146$ ;  $\text{S50} - \text{Ru17} - \text{O21} = 74.073$ ; B). Color code: Green = Ru, red = O, grey = C, yellow = S. Hydrogen atoms are omitted for clarity.

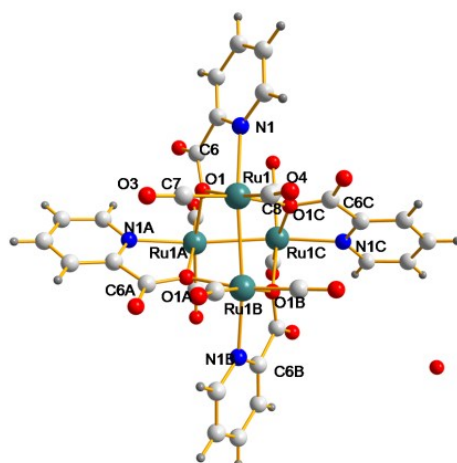

**Fig. S4** A) Ball-and-stick model representation of single-crystal X-ray diffraction structure of  $\text{Ru}_4(\text{CO})_8(\mu_2\text{-O}, \eta^1\text{-N-pic})_4 \cdot \text{H}_2\text{O}$  **4**. (H atoms excluded for clarity); selected bond lengths [ $\text{\AA}$ ] and angles [ $^\circ$ ]:  $\text{N1} - \text{Ru1} = 2.195(3)$ ;  $\text{Ru1} - \text{Ru1B} = 2.7575(6)$ ;  $\text{Ru1} - \text{O1C} = 2.130(3)$ ;  $\text{Ru1} - \text{O1} = 2.181(3)$ ;  $\text{Ru1A} - \text{O1A} = 2.181(3)$ ;  $\text{Ru1A} - \text{O1} = 2.130(3)$ ;  $\text{Ru1A} - \text{Ru1C} = 2.7575(6)$ ;  $\text{O1} - \text{Ru1} - \text{O1C} = 82.84(7)$ ;  $\text{O1} - \text{Ru1} - \text{N1} = 74.40(12)$ ;  $\text{O1C} - \text{Ru1} - \text{N1} = 87.48(12)$ ;  $\text{C8} - \text{Ru1} - \text{Ru1B} = 88.12(13)$ ;  $\text{C7} - \text{Ru1} - \text{Ru1} = 91.88(13)$ ;  $\text{O1C} - \text{Ru1} - \text{Ru1} = 80.67(7)$ ;  $\text{O1} - \text{Ru1} - \text{Ru1B} = 97.79(7)$ ; B). Color code: Green = Ru, red = O, blue = N; grey = C.

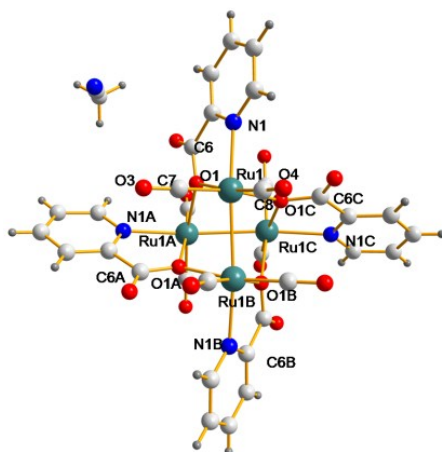

**Fig. S5** A) Ball-and-stick model representation of single-crystal X-ray diffraction structure of  $\text{Ru}_4(\text{CO})_8(\mu_2\text{-O}, \eta^1\text{-N-pic})_4 \cdot \text{CH}_3\text{CN}$  **5**; selected bond lengths [ $\text{\AA}$ ] and angles [ $^\circ$ ]:  $\text{N1} - \text{Ru1} = 2.198(3)$ ;  $\text{Ru1} - \text{Ru1B} = 2.7624(9)$ ;  $\text{Ru1} - \text{O1C} = 2.145(2)$ ;  $\text{Ru1} - \text{O1} = 2.188(2)$ ;  $\text{Ru1A} - \text{O1A} = 2.188(2)$ ;  $\text{Ru1A} - \text{O1} = 2.145(2)$ ;  $\text{Ru1A} - \text{Ru1C} = 2.7624(9)$ ;  $\text{O1} - \text{Ru1} - \text{O1C} = 82.61(7)$ ;  $\text{O1} - \text{Ru1} - \text{N1} = 74.57(10)$ ;  $\text{O1C} - \text{Ru1} - \text{N1} = 89.22(10)$ ;  $\text{C8} - \text{Ru1} - \text{Ru1B} = 92.19(10)$ ;  $\text{C7} - \text{Ru1} - \text{Ru1} = 87.84(11)$ ;  $\text{O1C} - \text{Ru1} - \text{Ru1} = 80.39(6)$ ;  $\text{O1} - \text{Ru1} - \text{Ru1B} = 98.00(6)$ ; B). Color code: Green = Ru, red = O, blue = N; grey = C.

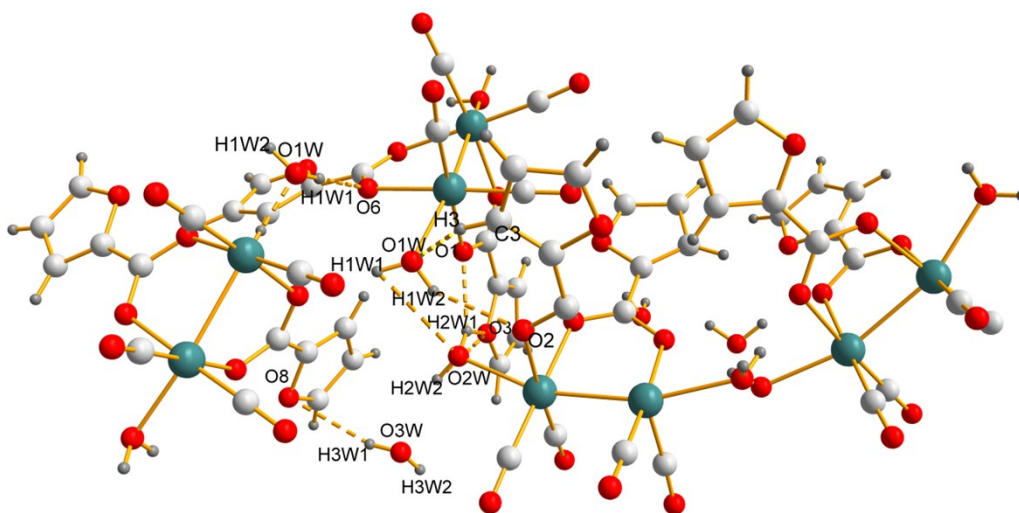

**Fig. S6** Ball-and-stick model representation of the packing structure of compound  $\text{Ru}_2(\text{CO})_4(\text{fur})_2(\text{H}_2\text{O})_2 \cdot \text{H}_2\text{O}$  (**2b**). Color code: Green = Ru, red = O, blue = N; grey = C.

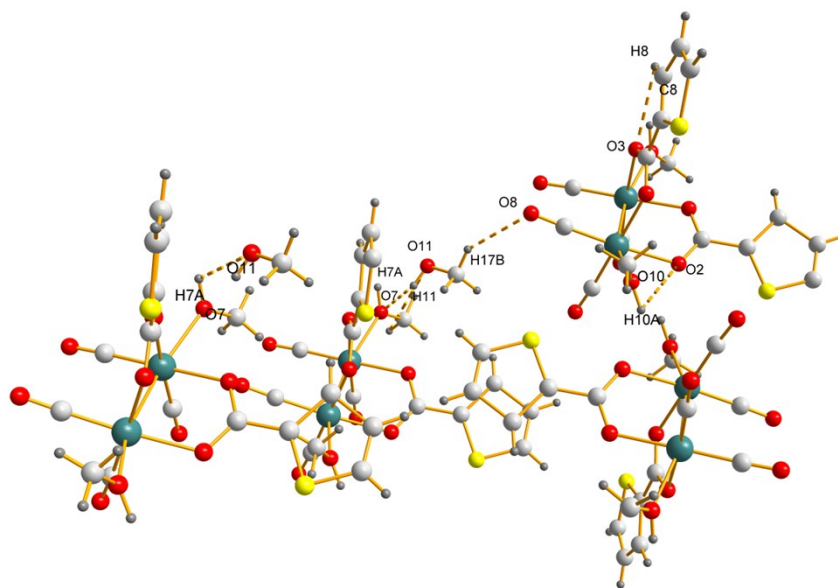

**Fig. S7** Ball-and-stick model representation of the packing structure of compound  $\text{Ru}_2(\text{CO})_4(\text{thi})_2(\text{CH}_3\text{OH})_2 \cdot \text{CH}_3\text{OH}$  (**3b**). Color code: Green = Ru, red = O, blue = N; grey = C.

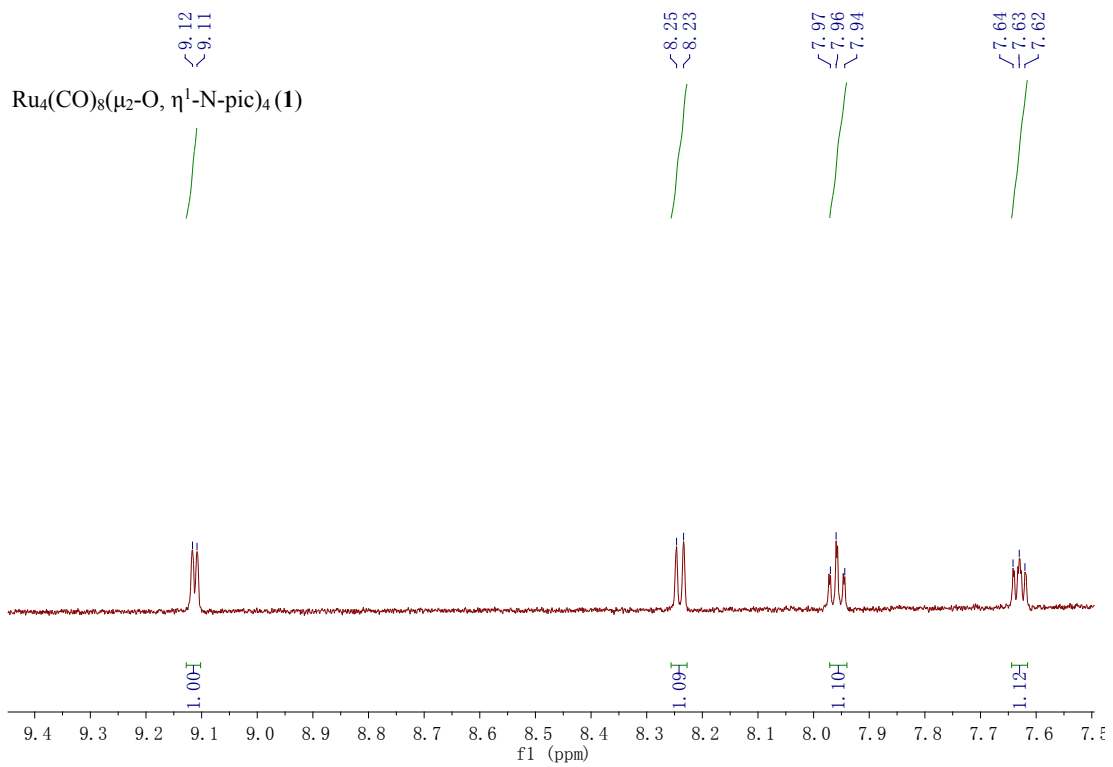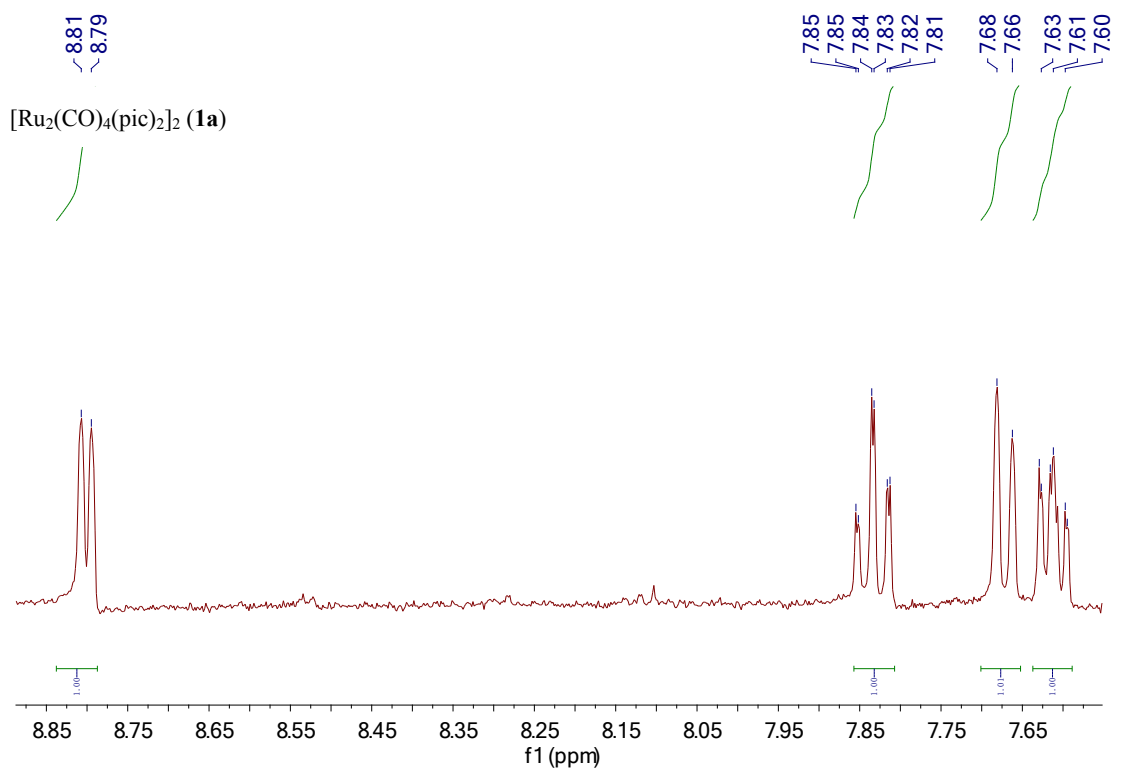

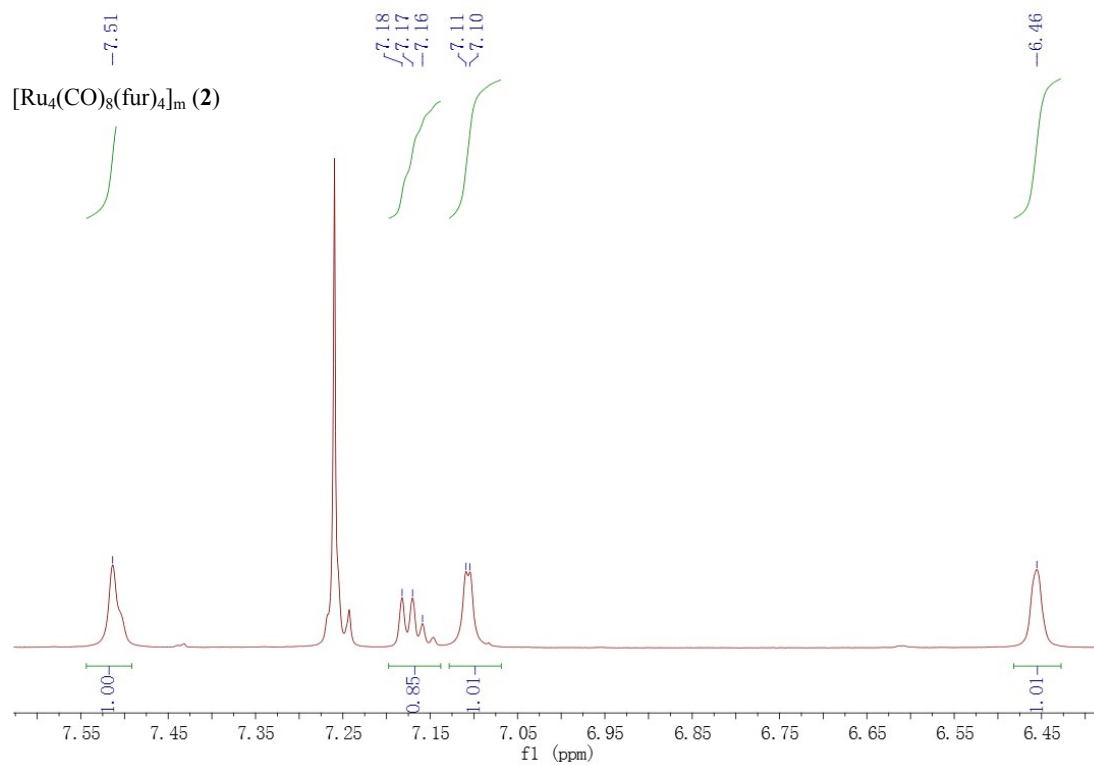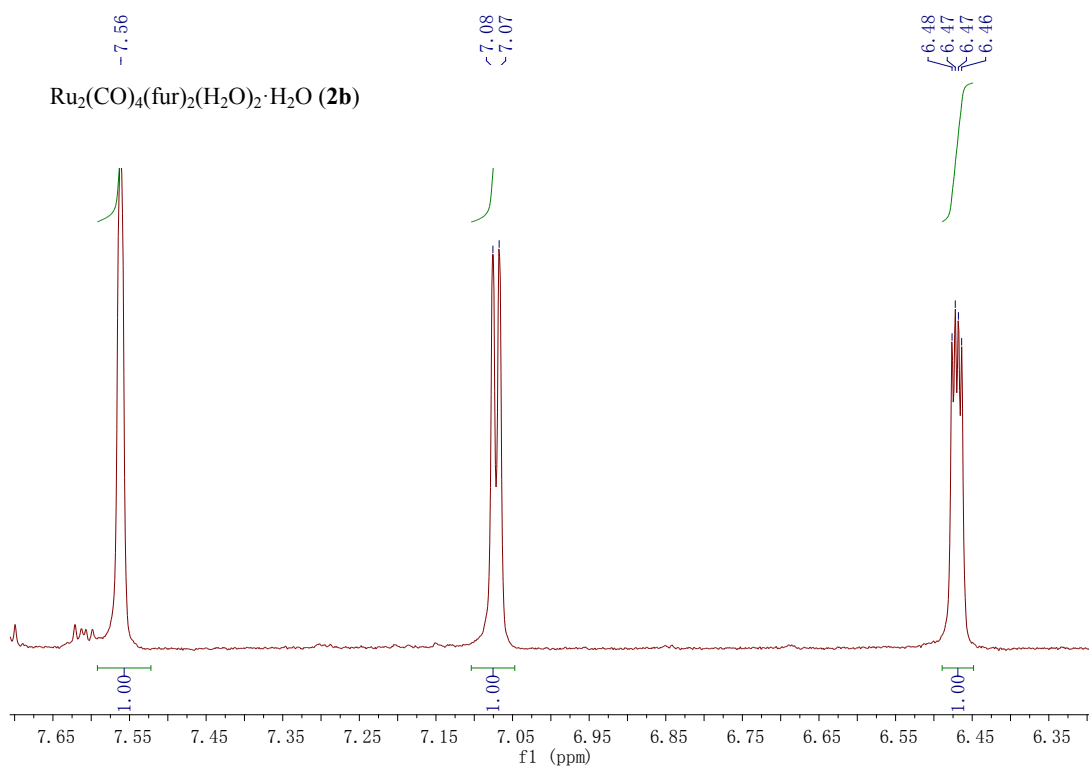

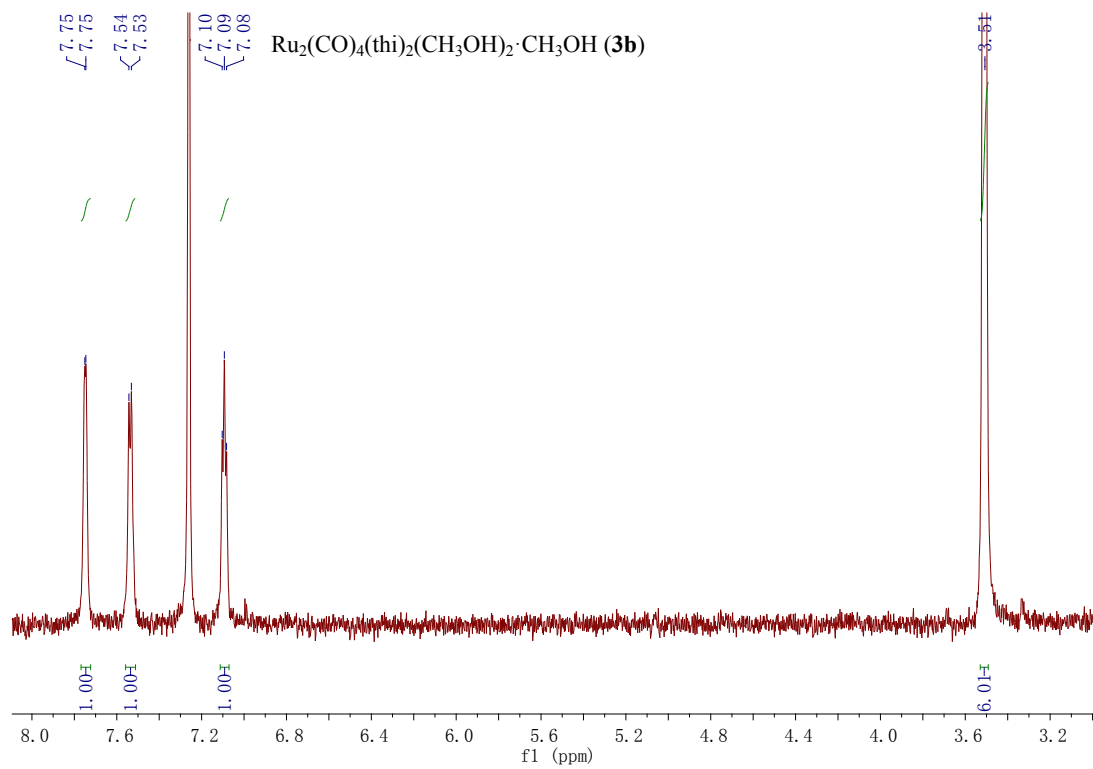

**Fig. S8**  $^1\text{H}$  NMR spectra of compounds **1**, **1a**, **2**, **2b** and **3b**



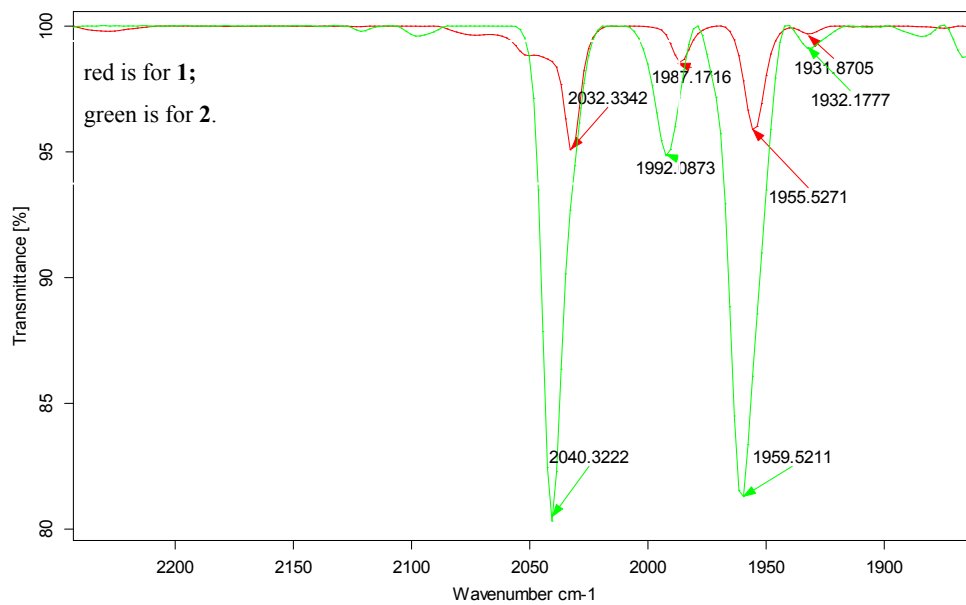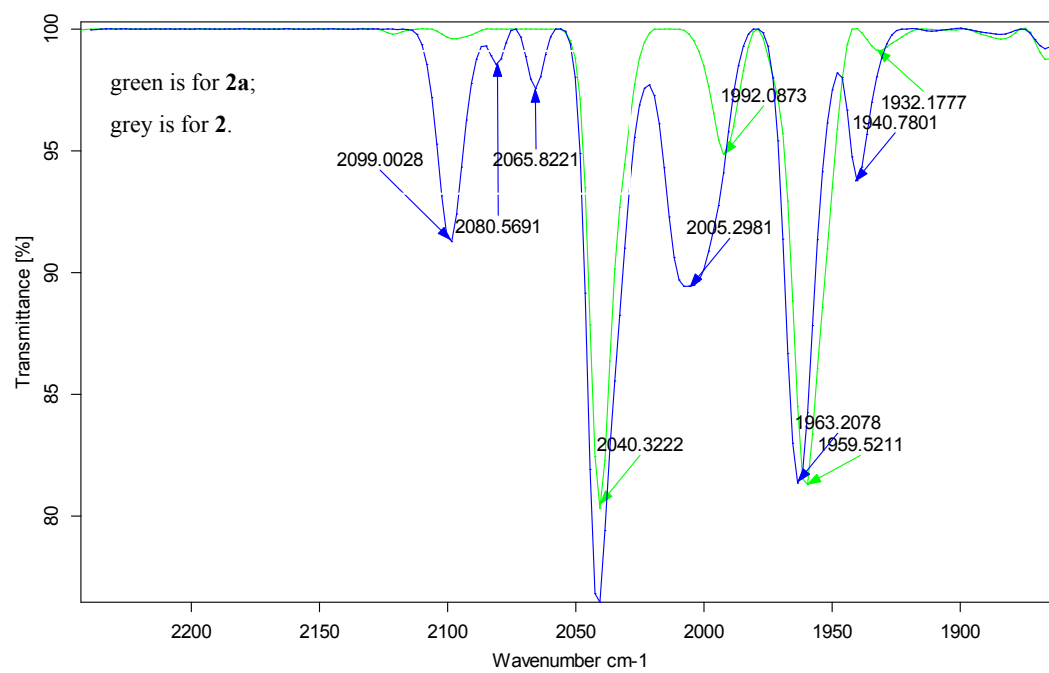

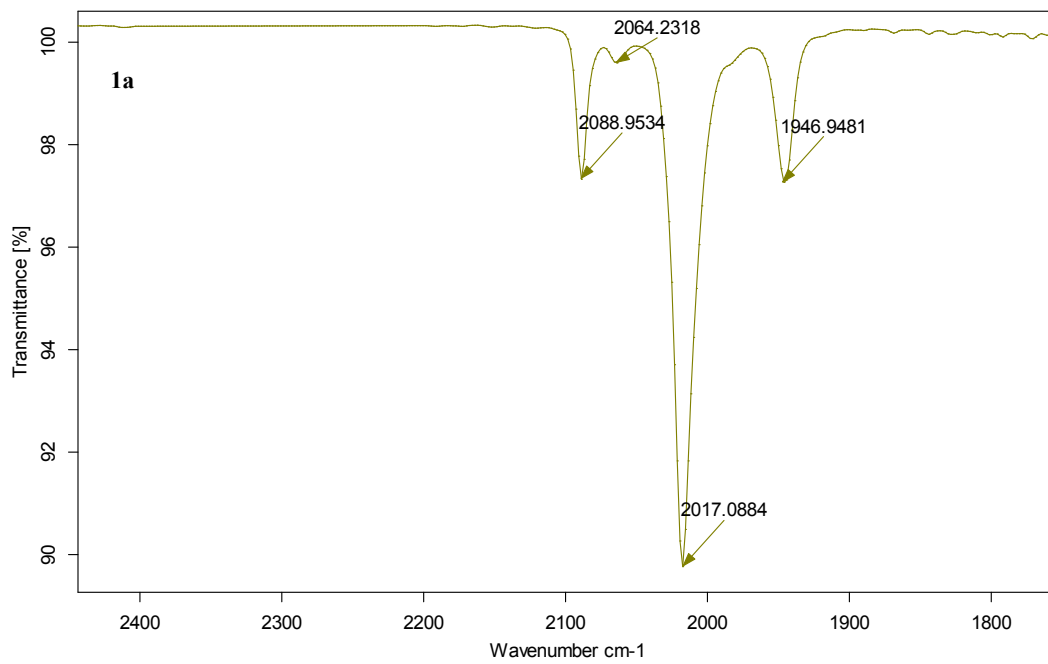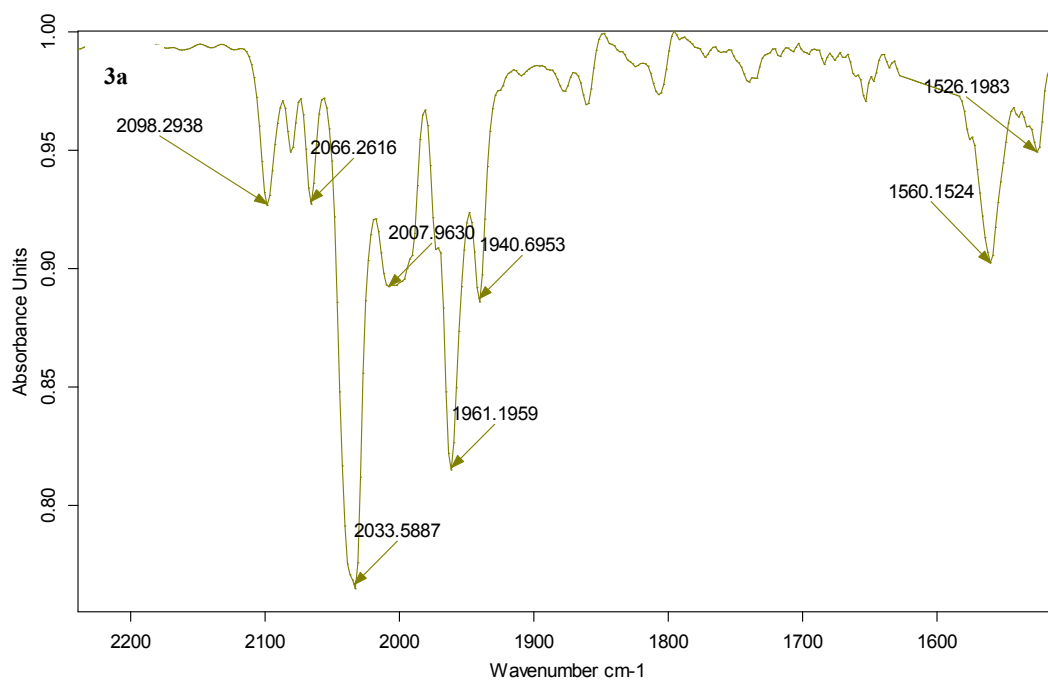

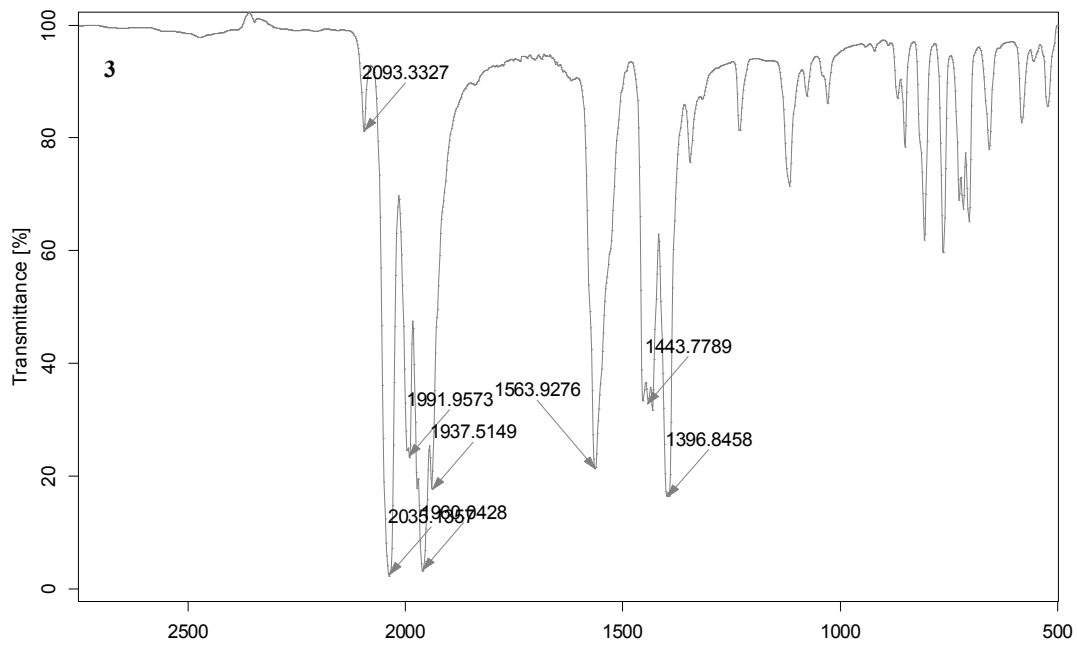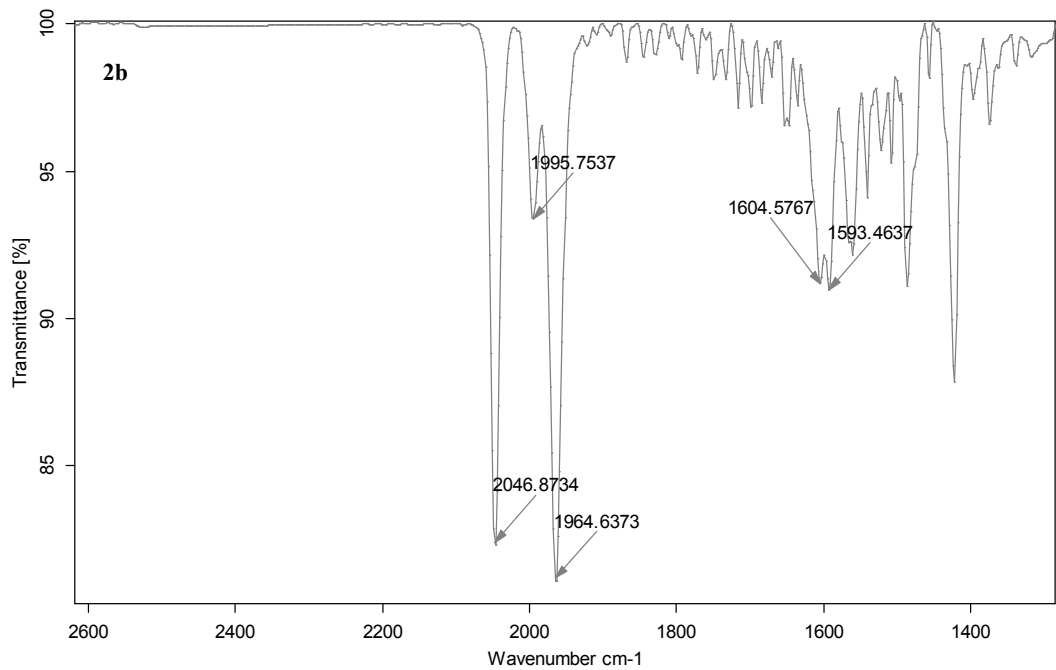

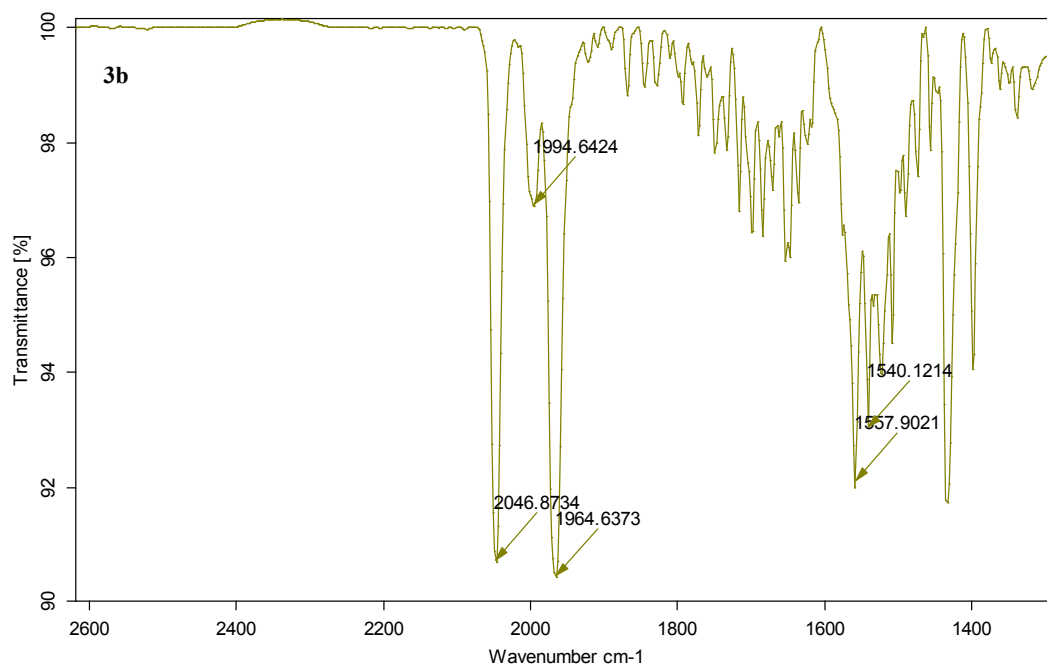

**Fig. S9** IR spectra of compounds **1**, **1a**, **2a**, **2b**, **3a**, **3** and **3b**

**Table S1.** Crystal and refinement data of **1**, **2b**, **3b**, **4** and **5**

| Compounds                                    | <b>1</b>                                                                       | <b>2b</b>                                                       | <b>3b</b>                                                                      | <b>4</b>                                                                       | <b>5</b>                                                                       |
|----------------------------------------------|--------------------------------------------------------------------------------|-----------------------------------------------------------------|--------------------------------------------------------------------------------|--------------------------------------------------------------------------------|--------------------------------------------------------------------------------|
| Formula                                      | C <sub>32</sub> H <sub>16</sub> N <sub>4</sub> O <sub>16</sub> Ru <sub>4</sub> | C <sub>14</sub> H <sub>12</sub> O <sub>13</sub> Ru <sub>2</sub> | C <sub>17</sub> H <sub>18</sub> O <sub>11</sub> Ru <sub>2</sub> S <sub>2</sub> | C <sub>40</sub> H <sub>28</sub> N <sub>8</sub> O <sub>16</sub> Ru <sub>4</sub> | C <sub>32</sub> H <sub>20</sub> N <sub>4</sub> O <sub>18</sub> Ru <sub>4</sub> |
| M                                            | 1116.77                                                                        | 590.38                                                          | 664.57                                                                         | 1280.98                                                                        | 1152.80                                                                        |
| Wavelength (Å)                               | 0.71073                                                                        | 0.71073                                                         | 0.71073                                                                        | 0.71073                                                                        | 0.71073                                                                        |
| Crystal system                               | Tetragonal                                                                     | Tetragonal                                                      | Monoclinic                                                                     | Tetragonal                                                                     | Tetragonal                                                                     |
| Space group                                  | P4(2)/n                                                                        | P4(1)2(1)2                                                      | C2/c                                                                           | P4(2)/n                                                                        | P4(2)/n                                                                        |
| <i>a</i> (Å)                                 | 15.1030(3)                                                                     | 11.3011(2)                                                      | 19.8822(6)                                                                     | 15.341(4)                                                                      | 15.1030(3)                                                                     |
| <i>b</i> (Å)                                 | 15.1030(3)                                                                     | 11.3011(2)                                                      | 8.7859(3)                                                                      | 15.341(4)                                                                      | 15.1030(3)                                                                     |
| <i>c</i> (Å)                                 | 10.0955(4)                                                                     | 30.7585(11)                                                     | 28.4716(8)                                                                     | 9.980(6)                                                                       | 10.0955(4)                                                                     |
| <i>α</i> (°)                                 | 90.00                                                                          | 90.00                                                           | 90.00                                                                          | 90.00                                                                          | 90.00                                                                          |
| <i>β</i> (°)                                 | 90.00                                                                          | 90.00                                                           | 104.659(3)                                                                     | 90.00                                                                          | 90.00                                                                          |
| <i>γ</i> (°)                                 | 90.00                                                                          | 90.00                                                           | 90.00                                                                          | 90.00                                                                          | 90.00                                                                          |
| <i>V</i> (Å <sup>3</sup> )                   | 2302.79(11)                                                                    | 3928.32(17)                                                     | 4811.6(3)                                                                      | 2348.8(16)                                                                     | 2302.79(11)                                                                    |
| <i>Z</i>                                     | 2                                                                              | 8                                                               | 8                                                                              | 2                                                                              | 2                                                                              |
| Calculated density (Mg m <sup>-3</sup> )     | 1.611                                                                          | 1.996                                                           | 1.835                                                                          | 1.811                                                                          | 1.663                                                                          |
| Absorption coefficient (mm <sup>-1</sup> )   | 1.679                                                                          | 1.603                                                           | 1.481                                                                          | 1.338                                                                          | 1.355                                                                          |
| <i>F</i> (000)                               | 1080                                                                           | 2304                                                            | 2624                                                                           | 1256                                                                           | 1120                                                                           |
| 2θ for data collection (°)                   | 3.37 to 25.99                                                                  | 3.20 to 26.00                                                   | 3.08 to 26.00                                                                  | 3.37 to 25.99                                                                  | 3.37 to 25.99                                                                  |
| Reflections collected /unique                | 11958 / 2267<br>[R(int) = 0.0296]                                              | 19804 / 3842<br>[R(int) = 0.0514]                               | 24823 / 4725<br>[R(int) = 0.0343]                                              | 14247 / 2303<br>[R(int) = 0.0381]                                              | 11956 / 2266<br>[R(int) = 0.0296]                                              |
| Data/restraints/parameters                   | 2267 / 0 / 127                                                                 | 3842 / 0 / 262                                                  | 4725 / 41 / 285                                                                | 2303 / 0 / 155                                                                 | 2266 / 0 / 136                                                                 |
| Goodness-of-fit on F <sup>2</sup>            | 1.148                                                                          | 1.165                                                           | 1.150                                                                          | 1.122                                                                          | 1.116                                                                          |
| Final R indices [I > 2σ(I)]                  | R1 = 0.0359<br>wR2 = 0.1143                                                    | R1 = 0.0445,<br>wR2 = 0.0862                                    | R1 = 0.0546<br>wR2 = 0.1455                                                    | R1 = 0.0340<br>wR2 = 0.0796                                                    | R1 = 0.0321<br>wR2 = 0.0917                                                    |
| R indices (all data)                         | R1 = 0.0501<br>wR2 = 0.1284                                                    | R1 = 0.0500,<br>wR2 = 0.0889                                    | R1 = 0.0657<br>wR2 = 0.1569                                                    | R1 = 0.0412<br>wR2 = 0.0834                                                    | R1 = 0.0464<br>wR2 = 0.1047                                                    |
| Largest peak diff, hole (e·Å <sup>-3</sup> ) | 0.995 and -0.433                                                               | 0.657 and -0.818                                                | 2.427 and -1.339                                                               | 0.577 and -0.674                                                               | 0.589 and -0.377                                                               |

**Table S2.** Hydrogen bonding distances (nm) and angles (°) for **2b** and **3b**.

| D–H···A                 | (D–H) (Å) | (H···A) (Å) | (D···A) (Å) | (D–H···A) (°) |
|-------------------------|-----------|-------------|-------------|---------------|
| <b>2b</b>               |           |             |             |               |
| O1W - H1W1···O6#1       | 0.85      | 1.96        | 2.810(7)    | 179           |
| O1W - H1W1···O2#2       | 0.85      | 2.47        | 3.113(7)    | 133           |
| O1W - H1W1···O2W#2      | 0.85      | 2.06        | 2.833(8)    | 151           |
| O2W - H2W1···O1#3       | 0.85      | 2.09        | 2.868(7)    | 151           |
| O2W - H2W1···O3#3       | 0.85      | 2.36        | 3.013(8)    | 134           |
| O2W - H2W2···O3W        | 0.85      | 1.96        | 2.734(12)   | 152           |
| O3W - H3W1···O8#4       | 0.85      | 2.45        | 3.281(12)   | 165           |
| O3W - H3W2···O4#5       | 0.85      | 2.47        | 3.134(12)   | 135           |
| C3 - H3···O1W#3         | 0.93      | 2.58        | 3.373(11)   | 143           |
| <b>3b</b>               |           |             |             |               |
| O(7) - H(7A)···O(11)    | 0.93      | 1.99        | 2.6187      | 124           |
| O(7) - H(7A)···O(11)#1  | 0.93      | 2.36        | 2.8558      | 113           |
| O(10) - H(10A)···O(2)#2 | 0.93      | 1.91        | 2.705(7)    | 141           |
| O(11) - H(11)···O(7)#1  | 0.93      | 2.18        | 2.8558      | 140           |
| O(11) - H(11)···O(7)#1  | 0.93      | 2.49        | 3.357(9)    | 156           |
| C(17) - H(17B)···O(8)#3 | 0.96      | 2.59        | 3.4341      | 146           |

Note: Symmetry transformations used to generate equivalent atoms. For **2b**: #1  $y, x, -z$ ; #2  $1/2-x, 1/2+y, 1/4-z$ ; #3  $1/2-x, -1/2+y, 1/4-z$ ; #4  $1/2-y, -1/2+x, 1/4+z$ ; #5  $3/2-x, -1/2+y, 1/4-z$ . For **3b**: #1  $1-x, y, 1/2-z$ ; #2  $1/2-x, 1/2-y, -z$ ; #3  $1/2-x, 1/2+y, 1/2-z$ .

**Table S3.** The geometric parameters of Ru<sub>4</sub>(CO)<sub>8</sub>(μ<sub>2</sub>-O, η<sup>1</sup>-N-pic)<sub>4</sub> (**1**)

B3LYP/LanL2DZ/6-31G

| Atom | Coordinates (Angstroms) |              |              |
|------|-------------------------|--------------|--------------|
| N    | 13.391830100            | 8.477313900  | 1.398226750  |
| Ru   | 12.201562670            | 10.260978200 | 0.939689140  |
| C    | 14.160572800            | 8.561890700  | 2.474407050  |
| C    | 14.968583300            | 7.507701300  | 2.881255700  |
| H    | 15.510781000            | 7.583216300  | 3.632360900  |
| C    | 14.944418500            | 6.341749700  | 2.140246000  |
| H    | 15.473023500            | 5.616805700  | 2.386576200  |
| C    | 14.142449200            | 6.266234700  | 1.050941550  |
| H    | 14.109222600            | 5.482389000  | 0.551214300  |
| C    | 13.388809500            | 7.330996200  | 0.693560850  |
| H    | 12.851142700            | 7.269073900  | -0.063601650 |
| C    | 14.053341500            | 9.815439700  | 3.287094800  |
| C    | 13.477917200            | 11.233611400 | 0.053506150  |
| C    | 11.508486000            | 9.767110100  | -0.678417600 |
| O    | 13.186429300            | 10.685372500 | 2.836835500  |
| O    | 14.687667500            | 9.957407900  | 4.303711650  |
| O    | 14.285927700            | 11.858875600 | -0.463383450 |
| O    | 11.165647900            | 9.448436800  | -1.714215900 |
| N    | 9.262669900             | 14.177186100 | 1.398226750  |
| Ru   | 10.452937330            | 12.393521800 | 0.939689140  |
| C    | 8.493927200             | 14.092609300 | 2.474407050  |
| C    | 7.685916700             | 15.146798700 | 2.881255700  |
| H    | 7.143719000             | 15.071283700 | 3.632360900  |
| C    | 7.710081500             | 16.312750300 | 2.140246000  |
| H    | 7.181476500             | 17.037694300 | 2.386576200  |
| C    | 8.512050800             | 16.388265300 | 1.050941550  |
| H    | 8.545277400             | 17.172111000 | 0.551214300  |
| C    | 9.265690500             | 15.323503800 | 0.693560850  |
| H    | 9.803357300             | 15.385426100 | -0.063601650 |
| C    | 8.601158500             | 12.839060300 | 3.287094800  |
| C    | 9.176582800             | 11.420888600 | 0.053506150  |
| C    | 11.146014000            | 12.887389900 | -0.678417600 |
| O    | 9.468070700             | 11.969127500 | 2.836835500  |
| O    | 7.966832500             | 12.697092100 | 4.303711650  |
| O    | 8.368572300             | 10.795624400 | -0.463383450 |
| O    | 11.488852100            | 13.206063200 | -1.714215900 |
| N    | 8.477313900             | 9.262669900  | 3.649523250  |
| Ru   | 10.260978200            | 10.452937330 | 4.108060860  |
| C    | 8.561890700             | 8.493927200  | 2.573342950  |
| C    | 7.507701300             | 7.685916700  | 2.166494300  |
| H    | 7.583216300             | 7.143719000  | 1.415389100  |

---

|    |              |              |             |
|----|--------------|--------------|-------------|
| C  | 6.341749700  | 7.710081500  | 2.907504000 |
| H  | 5.616805700  | 7.181476500  | 2.661173800 |
| C  | 6.266234700  | 8.512050800  | 3.996808450 |
| H  | 5.482389000  | 8.545277400  | 4.496535700 |
| C  | 7.330996200  | 9.265690500  | 4.354189150 |
| H  | 7.269073900  | 9.803357300  | 5.111351650 |
| C  | 9.815439700  | 8.601158500  | 1.760655200 |
| C  | 11.233611400 | 9.176582800  | 4.994243850 |
| C  | 9.767110100  | 11.146014000 | 5.726167600 |
| O  | 10.685372500 | 9.468070700  | 2.210914500 |
| O  | 9.957407900  | 7.966832500  | 0.744038350 |
| O  | 11.858875600 | 8.368572300  | 5.511133450 |
| O  | 9.448436800  | 11.488852100 | 6.761965900 |
| N  | 14.177186100 | 13.391830100 | 3.649523250 |
| Ru | 12.393521800 | 12.201562670 | 4.108060860 |
| C  | 14.092609300 | 14.160572800 | 2.573342950 |
| C  | 15.146798700 | 14.968583300 | 2.166494300 |
| H  | 15.071283700 | 15.510781000 | 1.415389100 |
| C  | 16.312750300 | 14.944418500 | 2.907504000 |
| H  | 17.037694300 | 15.473023500 | 2.661173800 |
| C  | 16.388265300 | 14.142449200 | 3.996808450 |
| H  | 17.172111000 | 14.109222600 | 4.496535700 |
| C  | 15.323503800 | 13.388809500 | 4.354189150 |
| H  | 15.385426100 | 12.851142700 | 5.111351650 |
| C  | 12.839060300 | 14.053341500 | 1.760655200 |
| C  | 11.420888600 | 13.477917200 | 4.994243850 |
| C  | 12.887389900 | 11.508486000 | 5.726167600 |
| O  | 11.969127500 | 13.186429300 | 2.210914500 |
| O  | 12.697092100 | 14.687667500 | 0.744038350 |
| O  | 10.795624400 | 14.285927700 | 5.511133450 |
| O  | 13.206063200 | 11.165647900 | 6.761965900 |

---



**Table S4.** The geometric parameter of Ru<sub>4</sub>(CO)<sub>8</sub>(μ<sub>2</sub>-O, η<sup>1</sup>-O-fur)<sub>4</sub> (**2c**)

B3LYP/LanL2DZ/6-31G

| Atom | Coordinates (Angstroms) |             |             |
|------|-------------------------|-------------|-------------|
| Ru   | -1.21633300             | 0.63080300  | 1.59691400  |
| C    | -1.87700600             | 2.70086700  | -0.66162500 |
| C    | -0.58742100             | 2.13385200  | 2.51995800  |
| C    | -1.65580200             | -0.21125000 | 3.20479400  |
| O    | -0.97674200             | 1.75494900  | -0.30159700 |
| O    | -1.67044400             | 3.53245100  | -1.56789400 |
| O    | -0.19858700             | 3.11222200  | 3.04160100  |
| O    | -1.95579500             | -0.67498800 | 4.23997300  |
| Ru   | 1.21633300              | -0.63080300 | 1.59691400  |
| C    | 1.87700600              | -2.70086700 | -0.66162500 |
| C    | 0.58742100              | -2.13385200 | 2.51995800  |
| C    | 1.65580200              | 0.21125000  | 3.20479400  |
| O    | 0.97674200              | -1.75494900 | -0.30159700 |
| O    | 1.67044400              | -3.53245100 | -1.56789400 |
| O    | 0.19858700              | -3.11222200 | 3.04160100  |
| O    | 1.95579500              | 0.67498800  | 4.23997300  |
| Ru   | -0.63146800             | -1.21647400 | -1.59778600 |
| C    | -2.69947200             | -1.87862600 | 0.66135700  |
| C    | -2.13422800             | -0.58547800 | -2.52010000 |
| C    | 0.21073700              | -1.65625300 | -3.20546700 |
| O    | -1.75424000             | -0.97783300 | 0.30097300  |
| O    | -3.53032200             | -1.67261100 | 1.56844600  |
| O    | -3.11137100             | -0.19160000 | -3.04028800 |
| O    | 0.67509700              | -1.95867500 | -4.23963600 |
| Ru   | 0.63146800              | 1.21647400  | -1.59778600 |
| C    | 2.69947200              | 1.87862600  | 0.66135700  |
| C    | 2.13422800              | 0.58547800  | -2.52010000 |
| C    | -0.21073700             | 1.65625300  | -3.20546700 |
| O    | 1.75424000              | 0.97783300  | 0.30097300  |
| O    | 3.53032200              | 1.67261100  | 1.56844600  |
| O    | 3.11137100              | 0.19160000  | -3.04028800 |
| O    | -0.67509700             | 1.95867500  | -4.23963600 |
| C    | 3.14349700              | -2.64316400 | 0.06293900  |
| C    | 4.32323400              | -3.33296800 | 0.00284300  |
| C    | 5.23216100              | -2.71295400 | 0.92930100  |
| H    | 4.52198100              | -4.17478100 | -0.64085400 |
| C    | 4.57686900              | -1.66966500 | 1.51978400  |
| H    | 6.25251400              | -3.00685600 | 1.11703600  |
| H    | 4.83044600              | -0.90380000 | 2.23134400  |
| C    | 2.64209400              | 3.14510400  | -0.06311100 |
| C    | 3.33078900              | 4.32531200  | 0.00036100  |

---

|   |             |             |             |
|---|-------------|-------------|-------------|
| C | 2.71220600  | 5.23508800  | -0.92615100 |
| H | 4.17088300  | 4.52347400  | 0.64643400  |
| C | 1.67044400  | 4.57997000  | -1.51957800 |
| H | 3.00597500  | 6.25586500  | -1.11186100 |
| H | 0.90573900  | 4.83438400  | -2.23206900 |
| C | -3.14349700 | 2.64316400  | 0.06293900  |
| C | -4.32323400 | 3.33296800  | 0.00284300  |
| C | -5.23216100 | 2.71295400  | 0.92930100  |
| H | -4.52198100 | 4.17478100  | -0.64085400 |
| C | -4.57686900 | 1.66966500  | 1.51978400  |
| H | -6.25251400 | 3.00685600  | 1.11703600  |
| H | -4.83044600 | 0.90380000  | 2.23134400  |
| C | -2.64209400 | -3.14510400 | -0.06311100 |
| C | -3.33078900 | -4.32531200 | 0.00036100  |
| C | -2.71220600 | -5.23508800 | -0.92615100 |
| H | -4.17088300 | -4.52347400 | 0.64643400  |
| C | -1.67044400 | -4.57997000 | -1.51957800 |
| H | -3.00597500 | -6.25586500 | -1.11186100 |
| H | -0.90573900 | -4.83438400 | -2.23206900 |
| O | -3.28063200 | 1.60685400  | 1.00654600  |
| O | 1.60767300  | 3.28275200  | -1.00856000 |
| O | 3.28063200  | -1.60685400 | 1.00654600  |
| O | -1.60767300 | -3.28275200 | -1.00856000 |

---

**Table S5.** The geometric parameter of Ru<sub>4</sub>(CO)<sub>8</sub>(μ<sub>2</sub>-O, η<sup>1</sup>-S-thi)<sub>4</sub> (**3c**)

B3LYP/LanL2DZ/6-31G

| Atom | Coordinates (Angstroms) |             |             |
|------|-------------------------|-------------|-------------|
| Ru   | -1.07753200             | 0.84648900  | 1.60618800  |
| C    | -1.27903000             | 3.07043800  | -0.70396600 |
| C    | -0.17229800             | 2.23542700  | 2.46529900  |
| C    | -1.63310700             | 0.14153100  | 3.24068700  |
| O    | -0.70223500             | 1.88887300  | -0.36076700 |
| O    | -0.86929300             | 3.78149100  | -1.63842600 |
| O    | 0.40986200              | 3.14901900  | 2.96516400  |
| O    | -1.98006000             | -0.23516200 | 4.30060300  |
| Ru   | 1.07753200              | -0.84648900 | 1.60618700  |
| C    | 1.27903000              | -3.07043800 | -0.70396700 |
| C    | 0.17229400              | -2.23543400 | 2.46530200  |
| C    | 1.63310800              | -0.14153100 | 3.24068900  |
| O    | 0.70223400              | -1.88887300 | -0.36076700 |
| O    | 0.86929300              | -3.78149100 | -1.63842600 |
| O    | -0.40985800             | -3.14901300 | 2.96516000  |
| O    | 1.98005900              | 0.23516100  | 4.30060100  |
| Ru   | -0.85319600             | -1.07343400 | -1.59207200 |
| C    | -3.07844600             | -1.29240200 | 0.71608400  |
| C    | -2.24063900             | -0.15083000 | -2.44723700 |
| C    | -0.15038900             | -1.62174700 | -3.22942100 |
| O    | -1.89320800             | -0.71137400 | 0.37617900  |
| O    | -3.77249200             | -0.89130400 | 1.66847800  |
| O    | -3.14147500             | 0.43891900  | -2.93592900 |
| O    | 0.22598700              | -1.97134800 | -4.28796700 |
| Ru   | 0.85319600              | 1.07343400  | -1.59207200 |
| C    | 3.07844600              | 1.29240300  | 0.71608300  |
| C    | 2.24064200              | 0.15082800  | -2.44723900 |
| C    | 0.15038700              | 1.62174800  | -3.22942600 |
| O    | 1.89320800              | 0.71137400  | 0.37617900  |
| O    | 3.77249200              | 0.89130400  | 1.66847800  |
| O    | 3.14147200              | -0.43891800 | -2.93592800 |
| O    | -0.22598500             | 1.97134600  | -4.28796200 |
| C    | 2.43626800              | -3.47793300 | 0.12923800  |
| C    | 2.88540800              | -4.70275600 | 0.42063300  |
| S    | 3.38687500              | -2.19314800 | 0.99641200  |
| C    | 3.96235500              | -4.72082300 | 1.36394100  |
| H    | 2.43778300              | -5.61531400 | -0.01255600 |
| C    | 4.33122300              | -3.50261400 | 1.79877300  |
| H    | 4.44917100              | -5.64068700 | 1.70418400  |
| H    | 5.13171400              | -3.20954000 | 2.48701600  |
| C    | 3.47720200              | 2.40724600  | -0.13079300 |

---

|   |             |             |             |
|---|-------------|-------------|-------------|
| C | 4.76469500  | 2.82726300  | -0.43852200 |
| S | 2.23484500  | 3.37200800  | -1.02816800 |
| C | 4.78625300  | 3.89178500  | -1.42392400 |
| H | 5.62576500  | 2.38795900  | -0.00511800 |
| C | 3.54831100  | 4.27593900  | -1.86897600 |
| H | 5.69339900  | 4.34062300  | -1.76706600 |
| H | 3.28331300  | 5.04413300  | -2.56900200 |
| C | -2.43626800 | 3.47793300  | 0.12923800  |
| C | -2.88540800 | 4.70275600  | 0.42063300  |
| S | -3.38687500 | 2.19314800  | 0.99641200  |
| C | -3.96235500 | 4.72082300  | 1.36394100  |
| H | -2.43778300 | 5.61531400  | -0.01255600 |
| C | -4.33122300 | 3.50261300  | 1.79877300  |
| H | -4.44917100 | 5.64068700  | 1.70418400  |
| H | -5.13171400 | 3.20954000  | 2.48701600  |
| C | -3.47720300 | -2.40724600 | -0.13079300 |
| C | -4.76469500 | -2.82726300 | -0.43852200 |
| S | -2.23484400 | -3.37200800 | -1.02816800 |
| C | -4.78625300 | -3.89178500 | -1.42392400 |
| H | -5.62576500 | -2.38795900 | -0.00511800 |
| C | -3.54831100 | -4.27593900 | -1.86897600 |
| H | -5.69339900 | -4.34062300 | -1.76706600 |
| H | -3.28331300 | -5.04413300 | -2.56900200 |

---
